# Supplementary material for: Stable Gene Targeting in Human Cells Using Single-Strand Oligonucleotides with Modified Bases
Source: PLoS One. 2012 May 14;7(5):e36697. doi: 10.1371/journal.pone.0036697 (PMC3351460; doi:10.1371/journal.pone.0036697)
Supplement: Dataset S1 — Top 400 hits from RNA-seq experiment. GFP+ and GFP- refers to cells after treating with oligo F5-17. (XLSX) [file pone.0036697.s011.xlsx]

## Sheet: Sheet1
Gene	Chr	Str	Start	End	Description	GFP+(norm)	GFP--(norm)	GFP+(reads)	GFP-(reads)	fold(GFP+/GFP-)	pvalue(GFP+/GFP-)
SPINK5	chr5	+	147443534	147516925	serine peptidase inhibitor, Kazal type 5	541.915	3032.41	5282	35597	0.178708	0
RLIM	chrX	-	73802812	73834461	ring finger protein, LIM domain interacting	68.1241	303.522	664	3563	0.224445	0
EIF5B	chr2	+	99953833	100016726	eukaryotic translation initiation factor 5B	155.126	553.802	1512	6501	0.280111	0
CR602933	chr5	-	17353821	17354728	full-length cDNA clone CS0DC022YF01 of Neuroblastoma Cot 25-normalized of Homo sapiens (human).	707.198	2292.64	6893	26913	0.308464	0
MT-TS1	chrM	-	7445	7514	tRNA serine 1	175.03	561.554	1706	6592	0.311688	0
TOP2A	chr17	-	38544797	38574169	Homo sapiens topoisomerase II alpha-2 (TOP2A) mRNA, partial cds.	320.511	984.678	3124	11559	0.325499	0
HSPCA	chr14	-	102549001	102552715	SubName: Full=Full-length cDNA clone CS0CAP007YF18 of Thymus of Homo sapiens (human);	445.269	1366.57	4340	16042	0.325829	0
IRS2	chr13	-	110406185	110438914	insulin receptor substrate 2	144.866	437.947	1412	5141	0.330785	0
EIF2S2	chr20	-	32676116	32700085	eukaryotic translation initiation factor 2 beta	169.489	469.041	1652	5506	0.361353	0
RPL17	chr18	-	47008029	47018906	ribosomal protein L17	362.063	998.138	3529	11717	0.362738	0
HSP90AA1	chr14	-	102547075	102606086	heat shock 90kDa protein 1, alpha	715.405	1959.65	6973	23004	0.365069	0
RPS26P11	chrX	+	71264258	71264809	Homo sapiens ribosomal protein S26 pseudogene 11 (RPS26P11), non-coding RNA.	186.11	508.227	1814	5966	0.366195	0
MT-TK	chrM	+	8294	8364	tRNA lysine	536.785	1425.18	5232	16730	0.376643	0
DDX21	chr10	+	70715891	70744279	DEAD (Asp-Glu-Ala-Asp) box polypeptide 21	273.317	696.149	2664	8172	0.392613	0
RPL32	chr3	-	12876444	12883081	ribosomal protein L32	673.546	1569.32	6565	18422	0.429197	0
NUCKS1	chr1	-	205681946	205719361	nuclear casein kinase and cyclin-dependent	324.923	754.588	3167	8858	0.430597	0
RPL26	chr17	-	8280833	8286565	ribosomal protein L26	851.859	1842.77	8303	21632	0.462271	0
FTH1	chr11	-	61731758	61735132	ferritin, heavy polypeptide 1	2958.68	5946.4	28838	69804	0.497557	0
RPS24	chr10	+	79793517	79816570	Homo sapiens full length insert cDNA clone YB24C12.	505.288	1011.68	4925	11876	0.499453	0
RPL10	chrX	+	153626570	153632038	SubName: Full=Ribosomal protein L10; Flags: Fragment;	750.904	1452.02	7319	17045	0.517146	0
PPIA	chr7	+	44836240	44842715	peptidylprolyl isomerase A	970.46	1737.39	9459	20395	0.558573	0
RPL35	chr9	-	127620157	127624240	ribosomal protein L35	1549	2680.93	15098	31471	0.577786	0
OK/SW-cl.46	chr16	+	89627089	89629848	RecName: Full=60S ribosomal protein L13;	1015.19	1741.57	9895	20444	0.582919	0
EC45	chr3	+	23958638	23961903	RecName: Full=Ribosomal protein L15;	1035.4	1768.23	10092	20757	0.585559	0
RPL13	chr16	+	89627089	89629848	ribosomal protein L13	1042.59	1767.29	10162	20746	0.589934	0
RPS14	chr5	-	149823793	149829319	ribosomal protein S14	923.368	1558.16	9000	18291	0.592602	0
AlphaTFEB	chr11	+	65265232	65273937	Homo sapiens clone alpha1 mRNA sequence.	1354.38	2271	13201	26659	0.596378	0
RPL15	chr3	+	23958638	23965185	ribosomal protein L15	1102.81	1824.03	10749	21412	0.604601	0
MT-RNR2	chrM	+	1670	3229	16S ribosomal RNA	35462.3	58202.8	345648	683234	0.609288	0
RPL11	chr1	+	24018293	24022913	SubName: Full=Ribosomal protein L11; Flags: Fragment;	1015.91	1645.48	9902	19316	0.617396	0
MT-ND4	chrM	+	10759	12137	NADH dehydrogenase subunit 4	6515.39	9978.82	63505	117140	0.652922	0
BC018860	chr1	+	566461	568045	Homo sapiens, clone IMAGE:3141568, mRNA.	5495.68	8395.02	53566	98548	0.654636	0
AB055772	chr17	-	19349246	19350178	Homo sapiens mRNA for ribosomal protein S2, partial cds.	1499.14	2253.29	14612	26451	0.665313	0
MT-CO2	chrM	+	7585	8269	Cytochrome c oxidase subunit II	18444.6	27213.8	179778	319459	0.677766	0
MT-ND6	chrM	-	14148	14673	NADH dehydrogenase subunit 6	2727.94	3905.24	26589	45843	0.698534	0
MT-CO1	chrM	+	5903	7445	Cytochrome c oxidase subunit I	10611.2	15150.6	103427	177851	0.700384	0
MT-CYB	chrM	+	14746	15887	Cytochrome b	3129.19	4387.31	30500	51502	0.713237	0
MT-TF	chrM	+	576	647	tRNA phenylalanine	6326.92	8778.37	61668	103048	0.72074	0
OK/KNS-cl.6	chr16	-	2012061	2014629	Homo sapiens OK/KNS-cl.6 mRNA for ribosomal protein S2, complete cds.	2766.92	3778.14	26969	44351	0.732352	0
MT-RNR1	chrM	+	647	1601	12S ribosomal RNA	6348.47	8649.65	61878	101537	0.733956	0
ACTG1chr7-	chr7	-	5566782	5570232	actin, gamma 1 propeptide	3540.71	4810.01	34511	56464	0.736113	0
RPS2	chr16	-	2012061	2014827	ribosomal protein S2	2790.42	3788.27	27198	44470	0.736594	0
ACTB	chr7	-	5566782	5570232	SubName: Full=cDNA FLJ32030 fis, clone NTONG2000040, highly similar to Actin, alpha cardiac;	3603.5	4826.79	35123	56661	0.746562	0
MT-ATP6	chrM	+	8526	9207	ATP synthase F0 subunit 6	8807.7	11484.8	85848	134818	0.766903	0
EEF2	chr19	-	3976054	3985461	eukaryotic translation elongation factor 2	3262.98	2202.17	31804	25851	1.48171	0
RPLP1	chr15	+	69745158	69747884	ribosomal protein P1	5873.14	3817.49	57245	44813	1.53848	0
DKFZp686L04275	chr12	-	49521567	49582861	SubName: Full=Putative uncharacterized protein DKFZp686L04275; Flags: Fragment;	2299.7	1449.2	22415	17012	1.58687	0
TMSB10	chr2	+	85132762	85133799	thymosin, beta 10	2844.28	1760.22	27723	20663	1.61587	0
FDPS	chr1	+	155278538	155290457	farnesyl diphosphate synthase	1560.39	944.215	15209	11084	1.65258	0
TUBBchr6_cox_hap2+	chr6_cox_hap2	+	2200224	2205261	tubulin, beta	1770.82	1065.18	17260	12504	1.66246	0
UBBchr17+	chr17	+	16284366	16286053	ubiquitin B precursor	1541.51	923.684	15025	10843	1.66887	0
TUBA1B	chr12	-	49521567	49580616	tubulin, alpha, ubiquitous	2202.13	1316.65	21464	15456	1.67252	0
C17orf45	chr17	+	16342300	16373962	Homo sapiens cDNA FLJ25777 fis, clone TST06567.	1377.46	790.792	13426	9283	1.74187	0
ACTG1chr17-	chr17	-	79476998	79479827	actin, gamma 1 propeptide	1676.94	961.167	16345	11283	1.74469	0
TUBBchr6+	chr6	+	30688156	30693193	tubulin, beta	1651.8	941.148	16100	11048	1.75509	0
TUBBchr6_dbb_hap3+	chr6_dbb_hap3	+	1981814	1986851	tubulin, beta	1651.6	940.977	16098	11046	1.75519	0
TUBBchr6_mann_hap4+	chr6_mann_hap4	+	2036250	2041287	tubulin, beta	1651.6	940.977	16098	11046	1.75519	0
TUBBchr6_mcf_hap5+	chr6_mcf_hap5	+	2070039	2075076	tubulin, beta	1651.6	940.977	16098	11046	1.75519	0
TUBBchr6_ssto_hap7+	chr6_ssto_hap7	+	2020463	2025500	tubulin, beta	1651.6	940.977	16098	11046	1.75519	0
TUBBchr6_apd_hap1+	chr6_apd_hap1	+	1999798	2004835	tubulin, beta	1651.6	940.892	16098	11045	1.75535	0
TUBBchr6_qbl_hap6+	chr6_qbl_hap6	+	1981087	1986125	tubulin, beta	1651.6	940.892	16098	11045	1.75535	0
A121/SUI1	chr17	+	39845126	39847897	Homo sapiens SUI1 isolog mRNA, complete cds.	1338.37	673.575	13045	7907	1.98697	0
EIF1	chr17	+	39845126	39847897	eukaryotic translation initiation factor 1	1430.81	715.572	13946	8400	1.99953	0
TUBB2Cchr6_cox_hap2+	chr6_cox_hap2	+	2200224	2204384	tubulin, beta, 2	1389.36	665.652	13542	7814	2.08722	0
TUBB2Cchr6+	chr6	+	30688156	30692316	tubulin, beta, 2	1389.46	665.652	13543	7814	2.08737	0
TUBB2Cchr6_dbb_hap3+	chr6_dbb_hap3	+	1981814	1985974	tubulin, beta, 2	1389.36	665.567	13542	7813	2.08748	0
TUBB2Cchr6_mann_hap4+	chr6_mann_hap4	+	2036250	2040410	tubulin, beta, 2	1389.36	665.567	13542	7813	2.08748	0
TUBB2Cchr6_mcf_hap5+	chr6_mcf_hap5	+	2070039	2074199	tubulin, beta, 2	1389.36	665.567	13542	7813	2.08748	0
TUBB2Cchr6_ssto_hap7+	chr6_ssto_hap7	+	2020463	2024623	tubulin, beta, 2	1389.36	665.567	13542	7813	2.08748	0
TUBB2Cchr6_apd_hap1+	chr6_apd_hap1	+	1999798	2003958	tubulin, beta, 2	1389.36	665.482	13542	7812	2.08775	0
TUBB2Cchr6_qbl_hap6+	chr6_qbl_hap6	+	1981087	1985248	tubulin, beta, 2	1389.36	665.482	13542	7812	2.08775	0
EEF1A2chr20-	chr20	-	62119365	62130505	eukaryotic translation elongation factor 1 alpha	988.927	462.651	9639	5431	2.13752	0
EDARADD	chr1	+	236557679	236648008	EDAR-associated death domain	570.026	211.86	5556	2487	2.69057	0
FLNA	chrX	-	153576899	153603006	filamin A, alpha	1384.54	490.337	13495	5756	2.82365	0
AK307158	chr16	+	3115355	3118666	Homo sapiens cDNA, FLJ97106.	451.219	153.678	4398	1804	2.93614	0
TAIF	chr16	+	3115621	3118666	Homo sapiens cDNA FLJ55649 complete cds, highly similar to Homo sapiens interleukin 32 (IL32), transcript variant 6, mRNA.	426.494	143.796	4157	1688	2.96596	0
HLA-Bchr6_qbl_hap6+	chr6_qbl_hap6	+	1203108	1527642	SubName: Full=MHC class I antigen; Flags: Fragment;	476.15	135.618	4641	1592	3.51097	0
DDTchr22-	chr22	-	24237098	24322019	D-dopachrome tautomerase	478.92	903.154	4668	10602	0.530275	1.53876e-305
RPS6	chr9	-	19376253	19380235	ribosomal protein S6	473.893	891.654	4619	10467	0.531476	6.88101e-300
RPS4X	chrX	-	71492453	71497141	ribosomal protein S4, X-linked X	625.12	1089.03	6093	12784	0.574014	6.35804e-294
AF113016	chr11	-	65266958	65271093	Homo sapiens clone alpha_est218/52C1 mRNA sequence.	557.201	997.456	5431	11709	0.558622	4.05441e-292
RPL21	chr13	+	27825691	27830700	SubName: Full=Ribosomal protein L21 variant; Flags: Fragment;	265.93	590.177	2592	6928	0.450594	3.83305e-290
HSPA1Achr6_qbl_hap6+	chr6_qbl_hap6	+	3076937	3079364	heat shock 70kDa protein 1A	423.416	162.622	4127	1909	2.60368	2.01476e-284
AK298056chr6_qbl_hap6-	chr6_qbl_hap6	-	3076966	3079369	Homo sapiens cDNA FLJ54370 complete cds, highly similar to Heat shock 70 kDa protein 1.	422.698	162.282	4120	1905	2.60472	3.99901e-284
HSPA1Achr6_cox_hap2+	chr6_cox_hap2	+	3292870	3295297	heat shock 70kDa protein 1A	422.39	162.707	4117	1910	2.59601	2.09971e-282
AK298056chr6_cox_hap2-	chr6_cox_hap2	-	3292899	3295302	Homo sapiens cDNA FLJ54370 complete cds, highly similar to Heat shock 70 kDa protein 1.	421.672	162.367	4110	1906	2.59703	4.17401e-282
RPS8	chr1	+	45241245	45244411	ribosomal protein S8	528.782	948.048	5154	11129	0.557759	5.32643e-279
FASN	chr17	-	80036214	80056106	fatty acid synthase	462.813	191.416	4511	2247	2.41784	2.31966e-274
BAT2D1	chr1	+	171454665	171562649	HBxAg transactivated protein 2	109.983	334.189	1072	3923	0.329105	4.16232e-272
HLA-Achr6_qbl_hap6+	chr6_qbl_hap6	+	1203108	1206446	SubName: Full=MHC class I antigen;	555.97	254.454	5419	2987	2.18495	2.62057e-271
ZNF90	chr19	+	20188802	20237885	zinc finger protein 90	311.38	631.748	3035	7416	0.492887	2.24598e-256
RPS16	chr19	-	39923848	39926618	SubName: Full=cDNA FLJ56786, moderately similar to 40S ribosomal protein S16;	1341.86	1942.27	13079	22800	0.690873	3.35901e-256
BAZ1B	chr7	-	72854741	72936608	bromodomain adjacent to zinc finger domain, 1B	118.396	338.789	1154	3977	0.349469	1.19333e-254
HSPA1Achr6_apd_hap1+	chr6_apd_hap1	+	3098051	3100478	heat shock 70kDa protein 1A	399.613	159.556	3895	1873	2.50454	5.05153e-252
AK298056chr6_apd_hap1-	chr6_apd_hap1	-	3098080	3100483	Homo sapiens cDNA FLJ54370 complete cds, highly similar to Heat shock 70 kDa protein 1.	398.895	159.215	3888	1869	2.50539	1.02141e-251
XTP2	chr1	+	171454665	171502100	Homo sapiens BAT2-iso mRNA, partial cds.	63.5072	240.143	619	2819	0.264456	7.93714e-251
HSPA1Achr6_dbb_hap3+	chr6_dbb_hap3	+	3068877	3071304	heat shock 70kDa protein 1A	387.302	153.507	3775	1802	2.52302	2.41216e-247
AK298056chr6_dbb_hap3-	chr6_dbb_hap3	-	3068906	3071309	Homo sapiens cDNA FLJ54370 complete cds, highly similar to Heat shock 70 kDa protein 1.	386.584	153.167	3768	1798	2.52394	4.86171e-247
IL32	chr16	+	3115312	3119667	interleukin 32	724.434	388.113	7061	4556	1.86656	1.74141e-243
THOC2	chrX	-	122734412	122866904	Homo sapiens Tho2 mRNA, complete cds.	69.15	246.872	674	2898	0.280104	4.50896e-243
HSPA1Achr6+	chr6	+	31783290	31785717	heat shock 70kDa protein 1A	383.3	152.911	3736	1795	2.50669	3.60361e-242
AK298056chr6-	chr6	-	31783319	31785722	Homo sapiens cDNA FLJ54370 complete cds, highly similar to Heat shock 70 kDa protein 1.	382.582	152.57	3729	1791	2.50758	7.28388e-242
TUBA1Cchr12+	chr12	+	49621708	49667113	tubulin alpha 6	1600.81	1081.37	15603	12694	1.48036	6.68875e-238
C1orf104	chr1	-	155286653	155293938	Homo sapiens cDNA FLJ35976 fis, clone TESTI2013427.	256.491	530.46	2500	6227	0.483526	3.95351e-225
DL491750	chr8	-	146017349	146017416	DL491750	333.336	128.803	3249	1512	2.58795	3.36314e-222
SCD	chr10	+	102106771	102124587	stearoyl-CoA desaturase 1	684.626	371.842	6673	4365	1.84118	8.90996e-222
MT-ND2	chrM	+	4469	5511	NADH dehydrogenase subunit 2	5728.68	6819.23	55837	80050	0.840077	3.26084e-221
ENO1	chr1	-	8921062	8938780	RecName: Full=Alpha-enolase; EC=4.2.1.11; AltName: Full=2-phospho-D-glycerate hydro-lyase; AltName: Full=Non-neural enolase; Short=NNE; AltName: Full=Enolase 1; AltName: Full=Phosphopyruvate hydratase; AltName: Full=C-myc promoter-binding protein; AltName: Full=MBP-1; AltName: Full=MPB-1; AltName: Full=Plasminogen-binding protein;	2296.93	1692.75	22388	19871	1.35692	9.61321e-216
GOLGA4	chr3	+	37284737	37408241	SubName: Full=GOLGA4 protein;	33.4465	163.815	326	1923	0.204172	1.14874e-214
BC009321/IMPDH2	chr3	-	49066131	49067139	Homo sapiens cDNA clone IMAGE:4123521, **** WARNING: chimeric clone ****.	188.059	48.0456	1833	564	3.91419	1.40746e-211
RPL41	chr12	+	56510373	56511615	ribosomal protein L41	1782.82	2392.91	17377	28090	0.745043	2.94156e-208
HSPA1Bchr6_qbl_hap6+	chr6_qbl_hap6	+	3076966	3091686	heat shock 70kDa protein 1B	558.638	289.21	5445	3395	1.9316	7.96189e-206
HSPA1Bchr6_cox_hap2+	chr6_cox_hap2	+	3292899	3307616	heat shock 70kDa protein 1B	555.252	286.996	5412	3369	1.93471	2.01124e-205
KIAA1532	chr19	+	2269519	2341948	SubName: Full=Putative uncharacterized protein ENSP00000371624;	244.487	80.9278	2383	950	3.02106	1.27269e-204
MT-ND5	chrM	+	12336	14148	NADH dehydrogenase subunit 5	3653.15	4497.54	35607	52796	0.812256	2.50623e-204
MAN1A2	chr1	+	117910084	118068320	SubName: Full=Putative uncharacterized protein MAN1A2;	75.6136	238.268	737	2797	0.317346	1.23534e-203
TUBA1Achr12+	chr12	+	49521741	49522719	Synthetic construct Homo sapiens gateway clone IMAGE:100019466 3' read TUBA1A mRNA.	1507.04	1039.28	14689	12200	1.45008	2.56697e-203
CR610533	chr8	+	30209518	30210853	SubName: Full=Class IVb beta tubulin;	261.621	91.8318	2550	1078	2.84892	5.20343e-202
RPLP0chr2+	chr2	+	38708925	38710087	SubName: Full=RPLP0 protein;	1404.96	959.293	13694	11261	1.46458	6.48286e-199
LOC401308	chr11	-	122929940	122932844	SubName: Full=Similar to Chain , Heat-Shock Cognate 70kd Protein (44kd Atpase N-Terminal) (E.C.3.6.1.3) Mutant With Asp 206 Replaced By Ser (D206s);	492.976	246.191	4805	2890	2.00241	1.26771e-198
MT-ND3	chrM	+	10058	10404	NADH dehydrogenase subunit 3	7603.53	6526.78	74111	76617	1.16497	1.08794e-192
RPLP2	chr11	+	809935	812876	ribosomal protein P2	1472.46	1022.25	14352	12000	1.44042	2.60947e-192
RAC1	chr7	+	6414125	6443597	ras-related C3 botulinum toxin substrate 1	158.101	362.557	1541	4256	0.436073	1.10212e-190
HSPA1Bchr6_apd_hap1+	chr6_apd_hap1	+	3098080	3112789	heat shock 70kDa protein 1B	517.599	269.788	5045	3167	1.91854	1.34693e-187
DQ597482	chr11	-	10529435	10530717	full-length cDNA clone CS0DM002YL19 of Fetal liver of Homo sapiens (human).	417.362	717.446	4068	8422	0.581733	1.81887e-186
RPL14	chr3	+	40498800	40503858	ribosomal protein L14	357.959	636.774	3489	7475	0.562145	7.51145e-184
YWHAB	chr20	+	43514343	43537160	tyrosine 3-monooxygenase/tryptophan	127.014	310.166	1238	3641	0.409504	7.01055e-183
HSPA1Bchr6_dbb_hap3+	chr6_dbb_hap3	+	3068906	3083619	heat shock 70kDa protein 1B	501.594	261.099	4889	3065	1.92109	1.77501e-182
CR624826	chr1	-	27730734	27732300	Homo sapiens cDNA: FLJ20887 fis, clone ADKA03276.	102.186	270.043	996	3170	0.378406	3.42732e-181
EDF1	chr9	-	139756570	139760738	endothelial differentiation-related factor 1	1095.11	724.858	10674	8509	1.5108	7.86855e-179
hCAP-C	chr3	+	160117429	160142807	Homo sapiens hCAP-C mRNA for chromosome-associated polypeptide-C, complete cds.	43.8087	168.074	427	1973	0.260651	1.16566e-178
HSPA1Bchr6+	chr6	+	31783319	31798031	heat shock 70kDa protein 1B	497.593	260.502	4850	3058	1.91013	2.10816e-178
SFRS11	chr1	+	70671364	70717683	splicing factor, arginine/serine-rich 11	57.7618	193.29	563	2269	0.298836	1.06439e-177
DCI	chr16	-	2289898	2301603	dodecenoyl-Coenzyme A delta isomerase precursor	107.624	276.262	1049	3243	0.389571	4.29048e-177
SSRP1	chr11	-	57093459	57103351	structure specific recognition protein 1	174.517	377.379	1701	4430	0.462444	8.9192e-177
RPN2	chr20	+	35807455	35870023	ribophorin II	234.843	461.203	2289	5414	0.509197	7.14378e-174
RBM12	chr20	-	34236887	34252848	RNA binding motif protein 12	199.345	64.5719	1943	758	3.08718	5.81642e-172
KTN1	chr14	+	56046924	56151301	kinectin 1	52.2216	179.66	509	2109	0.29067	1.68286e-170
KCP	chr7	-	128502504	128550773	Homo sapiens cDNA FLJ33365 fis, clone BRACE2005460, moderately similar to Xenopus laevis mRNA for Kielin.	239.46	88.9354	2334	1044	2.69252	2.15013e-170
ANXA2chr9+	chr9	+	33624222	33625530	annexin A2	660.414	389.731	6437	4575	1.69454	8.72575e-167
HMGA1	chr6	+	34204576	34214007	SubName: Full=cDNA FLJ54188, moderately similar to High mobility group protein HMG-I/HMG-Y;	599.471	344.412	5843	4043	1.74057	4.89258e-165
C15orf63	chr15	+	44084173	44094767	chromosome 15 open reading frame 63	906.337	584.98	8834	6867	1.54935	9.05836e-165
LOC100129034	chr9	+	127115751	127121461	Homo sapiens mRNA full length insert cDNA clone EUROIMAGE 685610.	151.227	333.678	1474	3917	0.453213	4.7667e-163
DHCR7	chr11	-	71145458	71159477	7-dehydrocholesterol reductase	213.093	76.4129	2077	897	2.7887	5.87191e-160
SMC4	chr3	+	160117429	160152739	SMC4 structural maintenance of chromosomes	70.3812	204.108	686	2396	0.344823	4.77163e-157
EIF4A1	chr17	+	7468275	7482324	eukaryotic translation initiation factor 4A	358.164	611.388	3491	7177	0.585821	1.02408e-155
ALDOA	chr16	+	30064471	30081734	fructose-bisphosphate aldolase A	1511.76	1101.38	14735	12929	1.3726	1.1992e-152
FAM166A	chr9	-	140138036	140142222	hypothetical protein LOC401565	202.115	398.676	1970	4680	0.506966	3.59244e-152
HSPA8	chr11	-	122928200	122933186	heat shock 70kDa protein 8	874.738	573.736	8526	6735	1.52464	6.51826e-149
BBX	chr3	+	107241782	107530047	HMG-BOX transcription factor BBX	72.6383	202.831	708	2381	0.358123	4.15256e-148
MRPS5	chr2	-	95752952	95787754	Homo sapiens MRPS5 mRNA for mitochondrial ribosomal protein S5, complete cds.	126.091	285.973	1229	3357	0.440919	1.0363e-147
ARF1	chr1	+	228270360	228286912	ADP-ribosylation factor 1	312.304	145.585	3044	1709	2.14517	1.44486e-147
RPL10A	chr6	+	35436177	35438558	ribosomal protein L10a	386.686	639.756	3769	7510	0.604428	6.68867e-147
TARG1	chr8	-	134249418	134253770	Homo sapiens TARG1 mRNA, 3' untranslated region.	39.8074	145.074	388	1703	0.274394	9.50351e-147
MAGED2	chrX	+	54834170	54842445	melanoma antigen family D, 2	199.55	72.7498	1945	854	2.74296	2.45815e-146
MDH2	chr7	+	75677392	75695928	mitochondrial malate dehydrogenase precursor	373.862	189.541	3644	2225	1.97245	9.11197e-146
rpl10a	chr6	+	35436371	35438558	SubName: Full=HCG1787790; SubName: Full=Putative uncharacterized protein ENSP00000344077;	389.661	641.63	3798	7532	0.6073	5.96948e-145
GPI	chr19	+	34855697	34891236	glucose phosphate isomerase	426.288	230.091	4155	2701	1.8527	2.96626e-141
LASP1	chr17	+	37026111	37078022	SubName: Full=cDNA FLJ51834, highly similar to LIM and SH3 domain protein 1;	239.768	100.01	2337	1174	2.39745	5.32281e-141
SNORD49B	chr17	+	16342822	16342869	Homo sapiens small nucleolar RNA, C/D box 49B (SNORD49B), non-coding RNA.	304.301	143.455	2966	1684	2.12123	1.9028e-140
JUP	chr17	-	39679869	39942964	junction plakoglobin	294.452	137.322	2870	1612	2.14425	4.03711e-139
KIAA0391	chr14	+	35591775	35786673	mitochondrial RNase P protein 3 precursor	60.6345	177.7	591	2086	0.341218	6.38665e-139
EBP	chrX	+	48380163	48387102	emopamil binding protein (sterol isomerase)	964.817	657.134	9404	7714	1.46822	7.64772e-139
MTDH	chr8	+	98656406	98742487	metadherin	50.7853	160.578	495	1885	0.316266	1.92603e-138
POLR2A	chr17	+	7387849	7417929	DNA-directed RNA polymerase II A	239.563	100.947	2335	1185	2.37316	2.45741e-138
SLC25A5	chrX	+	118602362	118605292	adenine nucleotide translocator 2	310.97	149.929	3031	1760	2.07411	1.30208e-136
CHD4	chr12	-	6679248	6716551	chromodomain helicase DNA binding protein 4	170.823	342.452	1665	4020	0.498823	4.30743e-136
ACLY	chr17	-	40023180	40075272	ATP citrate lyase	339.389	170.46	3308	2001	1.99103	1.57641e-135
DDX46	chr5	+	134094460	134166809	DEAD (Asp-Glu-Ala-Asp) box polypeptide 46	63.302	179.915	617	2112	0.351844	6.81874e-135
TMSB4X	chrX	+	12993224	12995345	thymosin, beta 4	964.202	1326.36	9398	15570	0.726951	1.52139e-134
FASN variant protein	chr17	-	80036336	80046760	Homo sapiens mRNA for FASN variant protein, partial cds, clone: ae00014.	260.185	116.451	2536	1367	2.23429	6.30753e-134
ASS1	chr9	+	133320093	133376660	argininosuccinate synthetase 1	1060.13	1437.02	10333	16869	0.737727	1.19009e-133
CSRP1	chr1	-	201452659	201476387	cysteine and glycine-rich protein 1	507.545	296.196	4947	3477	1.71355	2.39124e-133
METAP2	chr12	+	95867821	95909611	methionyl aminopeptidase 2	112.959	256.499	1101	3011	0.440387	5.4268e-133
VARSchr6_qbl_hap6-	chr6_qbl_hap6	-	3053031	3057358	SubName: Full=Valyl-tRNA synthetase; SubName: Full=Valyl-tRNA synthetase	118.909	30.9229	1159	363	3.84534	3.46942e-132
GAPD	chr12	+	6643656	6647536	RecName: Full=Glyceraldehyde 3-phosphate dehydrogenase; EC=1.2.1.12; Flags: Fragment;	2671.3	3247.42	26037	38121	0.822593	1.0275e-131
EIF4G2	chr11	-	10818593	10830582	eukaryotic translation initiation factor 4	382.89	203.938	3732	2394	1.87748	1.09257e-131
SNX22	chr15	+	64443915	64449680	Homo sapiens cDNA FLJ13952 fis, clone Y79AA1001068.	220.069	406.428	2145	4771	0.541472	3.81947e-131
GAPDH	chr12	+	6643656	6647536	glyceraldehyde-3-phosphate dehydrogenase	2675.2	3248.7	26075	38136	0.823469	2.00352e-130
GOLGB1	chr3	-	121382049	121468602	golgi autoantigen, golgin subfamily b	26.2647	111.254	256	1306	0.236078	3.37414e-130
MT-TE	chrM	-	14673	14742	tRNA glutamic acid	141.994	296.622	1384	3482	0.478702	1.41536e-129
COPA	chr1	-	160258377	160313354	Synthetic construct DNA, clone: pF1KB9459, Homo sapiens COPA gene for coatomer subunit alpha, complete cds, without stop codon, in Flexi system.	266.238	122.67	2595	1440	2.17037	3.36802e-129
SNORD101	chr6	+	133136445	133138490	Homo sapiens cDNA FLJ38828 fis, clone MAMGL1000017.	59.8137	170.715	583	2004	0.350372	7.7834e-129
MRPS15	chr1	-	36921361	36930040	mitochondrial ribosomal protein S15 precursor	129.272	277.625	1260	3259	0.465634	9.86059e-129
MAP7D3	chrX	-	135295380	135338641	MAP7 domain containing 3	29.8556	117.047	291	1374	0.255073	1.3264e-127
HSPA1Lchr6_cox_hap2-	chr6_cox_hap2	-	3286976	3293081	heat shock 70kDa protein 1-like	93.9784	19.8486	916	233	4.73476	4.22982e-126
HLA-Cchr6_mann_hap4-	chr6_mann_hap4	-	2583424	2671188	Homo sapiens HLA-C class I antigen (HLA-C) mRNA, HLA-Cw*05DZ allele, complete cds.	276.6	131.273	2696	1541	2.10705	5.1996e-126
HSPA1Lchr6_qbl_hap6-	chr6_qbl_hap6	-	3071044	3077148	heat shock 70kDa protein 1-like	94.081	19.9338	917	234	4.71967	6.47668e-126
EPRS	chr1	-	220141941	220220000	glutamyl-prolyl tRNA synthetase	195.139	367.753	1902	4317	0.530624	2.12381e-125
CENPF	chr1	+	214776531	214837912	centromere protein F	57.3514	164.496	559	1931	0.348649	4.70537e-125
CCT7	chr2	+	73461404	73480144	chaperonin containing TCP1, subunit 7	336.003	173.952	3275	2042	1.93159	1.32914e-124
NDUFC2	chr11	-	77779399	77791265	NADH dehydrogenase (ubiquinone) 1, subcomplex	285.321	138.77	2781	1629	2.05607	4.44631e-123
ARF3	chr12	-	49329991	49351252	ADP-ribosylation factor 3	319.691	163.389	3116	1918	1.95662	1.66839e-122
hCG_1994130	chr16	-	18794289	18801656	SubName: Full=HCG1994130	615.066	892.506	5995	10477	0.689145	2.9253e-120
OK/SW-cl.82	chr16	-	18794276	18801656	Homo sapiens OK/SW-cl.82 mRNA, complete cds.	614.861	891.824	5993	10469	0.689441	6.35893e-120
SURF4	chr9	-	136228340	136242970	surfeit 4	344.006	182.556	3353	2143	1.88439	1.14481e-119
QM	chrX	+	153627678	153632038	Homo sapiens mRNA expressed only in placental villi, clone SMAP26.	224.686	98.9875	2190	1162	2.26985	1.53543e-119
TM4SF1	chr3	-	149086804	149095568	transmembrane 4 superfamily member 1	1063.41	1417.86	10365	16644	0.750015	3.68765e-119
CBX3	chr7	+	26241098	26252974	SubName: Full=Chromobox homolog 3 (HP1 gamma homolog, Drosophila)	402.589	630.555	3924	7402	0.638467	1.14871e-118
AK303306	chr17	+	7210644	7213772	SubName: Full=cDNA FLJ51427;	132.76	42.2528	1294	496	3.14203	9.36383e-118
RPS15A	chr16	-	18794276	18801656	ribosomal protein S15a	621.222	896.169	6055	10520	0.693197	2.20871e-117
RPSAchr3+	chr3	+	39448203	39454030	ribosomal protein SA	301.941	501.667	2943	5889	0.601876	2.76886e-117
M37726	chr1	+	568843	568912	M37726	76.8448	191.245	749	2245	0.401813	3.57909e-117
LYRIC	chr8	+	98703179	98742487	Homo sapiens astrocyte elevated gene-1 AEG1 mRNA, complete cds.	32.8309	117.473	320	1379	0.279476	6.06403e-117
RPL29	chr3	-	52027644	52029958	ribosomal protein L29	466.506	707.82	4547	8309	0.659075	6.12598e-117
CPNE1	chr20	-	34213967	34252848	Homo sapiens mRNA for copine I variant protein.	342.877	183.408	3342	2153	1.86948	8.43536e-117
SLC3A2	chr11	+	62623517	62656352	solute carrier family 3, member 2	359.703	196.186	3506	2303	1.83348	3.90226e-116
EEF1Gchr11-	chr11	-	62327072	62342401	eukaryotic translation elongation factor 1	759.009	1058.02	7398	12420	0.717383	6.52436e-116
DDB1	chr11	-	61066919	61110047	damage-specific DNA binding protein 1	224.891	100.776	2192	1183	2.23159	9.46518e-116
PABPC1	chr8	-	101715143	101734315	Synthetic construct DNA, clone: pF1KB5695, Homo sapiens PABPC1 gene for polyadenylate-binding protein 1, complete cds, without stop codon, in Flexi system.	294.76	490.422	2873	5757	0.601032	3.0587e-115
TAX1BP1	chr7	+	27778991	27869384	Tax1 (human T-cell leukemia virus type I)	117.473	250.791	1145	2944	0.46841	4.79393e-115
FSCN1	chr7	+	5632453	5646285	fascin 1	376.939	210.157	3674	2467	1.79361	2.82092e-114
KRT80	chr12	-	52562780	52585784	keratin 80	174.311	68.4053	1699	803	2.54822	2.86478e-114
NOSIP	chr19	-	50058969	50083803	nitric oxide synthase interacting protein	315.792	165.178	3078	1939	1.91183	3.26761e-114
VPS72	chr1	-	151148933	151162640	transcription factor-like 1	165.693	63.3792	1615	744	2.61431	2.96992e-113
CCT4	chr2	-	62095262	62115791	RecName: Full=T-complex protein 1, delta subunit;	313.432	164.241	3055	1928	1.90837	7.54519e-113
TIMP1	chrX	+	47441689	47446189	SubName: Full=cDNA FLJ60276, weakly similar to Metalloproteinase inhibitor 1;	600.087	384.705	5849	4516	1.55986	9.2214e-113
KIAA0765	chr20	-	34213967	34252848	Homo sapiens mRNA for KIAA0765 protein, partial cds.	332.413	178.212	3240	2092	1.86527	1.2918e-112
BAT3chr6-	chr6	-	31606805	31620477	HLA-B associated transcript-3	179.133	72.3239	1746	849	2.47682	5.66921e-112
EIF4H	chr7	+	73588705	73611429	eukaryotic translation initiation factor 4H	286.552	145.5	2793	1708	1.96943	9.0032e-112
UBXD2	chr2	+	136511108	136542632	SubName: Full=cDNA FLJ38083 fis, clone CTONG2016408, highly similar to UBX domain-containing protein 2;	35.9088	120.455	350	1414	0.29811	9.30388e-112
OK/SW-cl.110	chrX	+	77359665	77382322	Homo sapiens OK/SW-cl.110 mRNA for phosphoglycerete kinase 1, complete cds.	379.197	213.479	3696	2506	1.77627	9.73876e-112
PGK1	chrX	+	77359665	77382322	phosphoglycerate kinase 1	379.197	213.479	3696	2506	1.77627	9.73876e-112
BAT3chr6_mcf_hap5-	chr6_mcf_hap5	-	2986492	3000157	HLA-B associated transcript-3	177.697	71.6424	1732	841	2.48033	2.34229e-111
BAT3chr6_dbb_hap3-	chr6_dbb_hap3	-	2892376	2906056	HLA-B associated transcript-3	177.595	71.6424	1731	841	2.4789	3.47762e-111
BAT3chr6_mann_hap4-	chr6_mann_hap4	-	2949688	2963366	HLA-B associated transcript-3	177.595	71.6424	1731	841	2.4789	3.47762e-111
CLSPN	chr1	-	36201819	36235551	claspin	47.3996	139.707	462	1640	0.339279	1.88354e-110
CALU	chr7	+	128379345	128411530	calumenin	245.206	421.251	2390	4945	0.58209	4.32823e-110
NDUFB4	chr3	+	120315127	120321173	SubName: Full=Putative uncharacterized protein ENSP00000244249; Flags: Fragment;	401.46	231.454	3913	2717	1.73452	5.36476e-110
SMC3	chr10	+	112327448	112364390	structural maintenance of chromosomes 3	52.632	147.885	513	1736	0.355898	1.865e-109
PSMA6	chr14	+	35761573	35786673	SubName: Full=cDNA FLJ52022, highly similar to Proteasome subunit alpha type 6 (EC 3.4.25.1); SubName: Full=cDNA, FLJ79122, highly similar to Proteasome subunit alpha type 6 (EC 3.4.25.1);	80.0253	190.904	780	2241	0.41919	8.0182e-109
HLA-Cwchr6_mann_hap4-	chr6_mann_hap4	-	2583424	2586739	SubName: Full=MHC class I antigen;	251.567	122.67	2452	1440	2.05077	4.0612e-108
SFRS2IP	chr12	-	46312915	46385903	splicing factor, arginine/serine-rich 2	37.0373	120.54	361	1415	0.307262	4.99976e-108
CTSZ	chr20	-	57570241	57582309	cathepsin Z preproprotein	81.7694	192.864	797	2264	0.423975	9.88077e-108
GHITM	chr10	+	85899184	85913311	growth hormone inducible transmembrane protein	271.778	137.151	2649	1610	1.98159	1.07711e-107
HLA-Bchr6_mcf_hap5-	chr6_mcf_hap5	-	2617066	2704782	SubName: Full=HLA-B protein; Flags: Fragment;	417.773	245.68	4072	2884	1.70048	1.89498e-107
DDX27	chr20	+	47835831	47860612	DEAD (Asp-Glu-Ala-Asp) box polypeptide 27	82.2824	193.204	802	2268	0.425882	4.70428e-107
HLA-Cchr6_mcf_hap5-	chr6_mcf_hap5	-	2617066	2704782	Homo sapiens HLA-C class I antigen (HLA-C) mRNA, HLA-Cw*05DZ allele, complete cds.	220.582	102.139	2150	1199	2.15962	2.77652e-106
SEC62	chr3	+	169684579	169716159	translocation protein 1	65.8669	166.541	642	1955	0.3955	5.8569e-105
CTSD	chr11	-	1773984	1785222	cathepsin D preproprotein	264.391	133.829	2577	1571	1.97559	4.6512e-104
HSP90B1	chr12	+	104324188	104341703	SubName: Full=HSP90B1 protein;	191.548	344.923	1867	4049	0.555335	4.65153e-104
MT-ND1	chrM	+	3306	4262	NADH Dehydrogenase subunit 1	3685.88	4276.4	35926	50200	0.861913	2.65932e-103
LARP7	chr4	+	113558119	113578741	La ribonucleoprotein domain family, member 7	28.8296	103.332	281	1213	0.279	2.86015e-103
PRDX6	chr1	+	173446485	173457946	peroxiredoxin 6	463.018	283.929	4513	3333	1.63075	3.40266e-103
SND1	chr7	+	127292201	127732658	staphylococcal nuclease domain containing 1	336.927	188.008	3284	2207	1.79209	4.21671e-102
ATRX	chrX	-	76760358	77041719	transcriptional regulator ATRX	29.3426	103.588	286	1216	0.283264	6.93681e-102
BRD2chr6_dbb_hap3+	chr6_dbb_hap3	+	4226964	4230623	SubName: Full=Bromodomain containing 2; SubName: Full=Bromodomain containing 2	90.7979	202.405	885	2376	0.448596	1.10873e-101
CALR	chr19	+	13049413	13055304	calreticulin precursor	976	708.246	9513	8314	1.37805	1.63583e-101
TAF1D	chr11	-	93463447	93474662	Homo sapiens cDNA: FLJ23363 fis, clone HEP15507.	112.446	233.754	1096	2744	0.481044	1.93977e-101
FUS	chr16	+	31191452	31203097	fusion (involved in t(12;16) in malignant	250.951	125.821	2446	1477	1.9945	3.86002e-101
BAT2chr6_cox_hap2+	chr6_cox_hap2	+	3098066	3115169	HLA-B associated transcript-2	227.764	109.551	2220	1286	2.07908	4.08838e-101
DYNLL1	chr12	+	120907659	120936297	dynein light chain 1	336.722	188.519	3282	2213	1.78614	4.6123e-101
GARS	chr7	+	30634180	30673646	glycyl-tRNA synthetase	197.909	350.716	1929	4117	0.5643	5.21655e-101
RBM25	chr14	+	73525220	73588074	RecName: Full=RNA-binding protein 25; AltName: Full=RNA-binding motif protein 25; AltName: Full=RNA-binding region-containing protein 7; AltName: Full=Arg/Glu/Asp-rich protein of 120 kDa; Short=RED120; AltName: Full=Protein S164;	80.333	186.304	783	2187	0.431193	5.29805e-101
2011-09-09	chr17	+	75277491	75496676	septin 9	186.623	81.6945	1819	959	2.2844	7.70111e-101
FUS/CHOP	chr16	+	31191452	31203097	SubName: Full=cDNA FLJ57206, moderately similar to RNA-binding protein FUS;	251.054	126.162	2447	1481	1.98993	1.2452e-100
PTP4A2	chr1	-	32373792	32403988	protein tyrosine phosphatase type IVA, member 2	65.2514	162.707	636	1910	0.401035	2.74178e-100
LRRFIP1	chr2	+	238536223	238690288	leucine rich repeat (in FLII) interacting	29.9582	103.673	292	1217	0.288969	8.19749e-100
AKAP9	chr7	+	91570188	91739986	A-kinase anchor protein 9	14.4661	73.3461	141	861	0.197231	1.29657e-99
DNAJC2	chr7	-	102952921	102985320	SubName: Full=DNAJC2 protein;	45.3476	129.825	442	1524	0.349298	7.72592e-99
SON	chr21	+	34915349	34949812	Homo sapiens SON DNA binding protein	137.684	267.147	1342	3136	0.515389	1.35133e-98
UBXN4	chr2	+	136499188	136542632	UBX domain containing 2	46.1684	130.762	450	1535	0.353071	4.43886e-98
RPS26	chr12	+	56435685	56438005	ribosomal protein S26	256.183	423.38	2497	4970	0.605091	1.64262e-97
GPR56	chr16	+	57653649	57698944	SubName: Full=G protein-coupled receptor 56;	120.653	41.4861	1176	487	2.90828	6.1595e-97
DEK	chr6	-	18224399	18264799	DEK oncogene	70.176	168.159	684	1974	0.417318	7.79767e-97
SPOP	chr17	-	47676247	47755525	speckle-type POZ protein	32.5231	106.74	317	1253	0.304696	8.35008e-97
UBA1	chrX	+	47050198	47074526	ubiquitin-activating enzyme E1	484.666	306.333	4724	3596	1.58215	1.34441e-96
Y16709	chr9	-	131457267	131457421	Homo sapiens mRNA from HIV associated non-Hodgkin's lymphoma (clone hl1-98).	78.8967	181.023	769	2125	0.435839	2.85548e-96
RPL27A	chr11	+	8703994	8711418	ribosomal protein L27a	1393.88	1751.28	13586	20558	0.795919	6.16691e-96
RSF1	chr11	-	77377274	77531880	remodeling and spacing factor 1	25.1361	92.854	245	1090	0.270706	6.80853e-96
PRDX5	chr11	+	64085568	64089282	peroxiredoxin 5	323.897	182.386	3157	2141	1.77589	1.15135e-95
BAT2chr6_dbb_hap3+	chr6_dbb_hap3	+	2874021	2891125	HLA-B associated transcript-2	216.786	104.78	2113	1230	2.06896	2.66669e-95
BAT2chr6_mann_hap4+	chr6_mann_hap4	+	2931333	2948437	HLA-B associated transcript-2	213.503	102.651	2081	1205	2.0799	5.48616e-95
CDKN1A	chr6	+	36645587	36655108	cyclin-dependent kinase inhibitor 1A	269.418	142.518	2626	1673	1.89041	6.25762e-95
RNASEK	chr17	+	6915797	6918197	ribonuclease kappa	422.185	258.969	4115	3040	1.63025	3.67054e-94
L01117	chr17	+	42426525	42428179	L01117	96.9537	28.7933	945	338	3.36723	6.40952e-94
PRPF8	chr17	-	1553923	1588176	U5 snRNP-specific protein	297.53	163.985	2900	1925	1.81437	1.26626e-93
BSG	chr19	+	571324	583492	Homo sapiens mRNA for CD147, complete cds.	624.813	422.528	6090	4960	1.47875	1.28792e-93
hEMMPRIN	chr19	+	572536	583492	Homo sapiens mRNA for EMMPRIN, complete cds.	623.787	422.017	6080	4954	1.47811	2.77851e-93
RPL12	chr9	-	130209954	130213684	Homo sapiens mRNA for ribosomal protein L12 variant protein.	1125.59	847.868	10971	9953	1.32755	3.16797e-93
PKM2	chr15	-	72491369	72523684	Homo sapiens Opa-interacting protein OIP3 mRNA, partial cds.	1346.27	1041.07	13122	12221	1.29316	5.54847e-93
PLEC1	chr8	-	144989320	145050913	plectin	228.688	114.406	2229	1343	1.99891	8.08562e-93
NDUFB9	chr8	+	125551342	125580751	NADH dehydrogenase (ubiquinone) 1 beta	505.801	326.522	4930	3833	1.54905	9.33992e-93
AB209575	chr19	+	34856138	34860072	SubName: Full=Glucose phosphate isomerase variant; Flags: Fragment;	101.776	31.9452	992	375	3.18595	2.83856e-92
C6orf21 variant proteinchr6_ssto_hap7+	chr6_ssto_hap7	+	2919252	2933851	Homo sapiens mRNA for C6orf21 variant protein, partial cds, clone: hj06729.	78.6915	19.6782	767	231	3.99891	1.69975e-91
GPATCH4	chr1	-	156564281	156571270	G patch domain containing 4	53.145	138.174	518	1622	0.384625	2.48883e-91
RIOK1	chr6	+	7390061	7418268	RIO kinase 1	17.1336	74.9647	167	880	0.228556	8.87641e-91
C6orf21 variant proteinchr6_cox_hap2+	chr6_cox_hap2	+	3098066	3112665	Homo sapiens mRNA for C6orf21 variant protein, partial cds, clone: hj06729.	78.1785	19.6782	762	231	3.97284	2.37362e-90
C6orf21 variant proteinchr6_qbl_hap6+	chr6_qbl_hap6	+	2882090	2896686	Homo sapiens mRNA for C6orf21 variant protein, partial cds, clone: hj06729.	78.1785	19.6782	762	231	3.97284	2.37362e-90
RPL13AP20	chr12	+	13028410	13029069	SubName: Full=Ribosomal protein L13a variant; Flags: Fragment;	169.797	303.863	1655	3567	0.558796	2.74685e-90
TUBA1Cchr12-	chr12	-	49666045	49667009	Synthetic construct Homo sapiens gateway clone IMAGE:100017296 3' read TUBA1C mRNA.	1249.21	960.315	12176	11273	1.30084	4.21677e-90
KIF5B	chr10	-	32297939	32345371	kinesin family member 5B	50.8879	133.829	496	1571	0.380245	4.34956e-90
HSPA1Lchr6_apd_hap1-	chr6_apd_hap1	-	3092157	3098262	heat shock 70kDa protein 1-like	71.8175	16.6115	700	195	4.32336	8.95969e-90
HSPA1Lchr6-	chr6	-	31777396	31783501	heat shock 70kDa protein 1-like	71.9201	16.6967	701	196	4.30745	1.30149e-89
HSPA1Lchr6_dbb_hap3-	chr6_dbb_hap3	-	3062983	3069088	heat shock 70kDa protein 1-like	71.9201	16.6967	701	196	4.30745	1.30149e-89
POLR2J4	chr7	-	43980493	44058748	Homo sapiens cDNA FLJ58900 complete cds, weakly similar to Uroplakin-3B precursor.	203.449	98.306	1983	1154	2.06955	1.30613e-89
NDUFS6	chr5	+	1801508	1816163	NADH dehydrogenase (ubiquinone) Fe-S protein 6	841.907	609.088	8206	7150	1.38224	2.45975e-89
C6orf21 variant proteinchr6_mann_hap4+	chr6_mann_hap4	+	2931333	2945933	Homo sapiens mRNA for C6orf21 variant protein, partial cds, clone: hj06729.	74.485	18.0597	726	212	4.12438	3.20499e-89
ATP2B1	chr12	-	89981827	90049844	plasma membrane calcium ATPase 1	38.4737	112.958	375	1326	0.340601	3.37514e-89
ARHGEF18	chr19	+	7447719	7537370	Rho/Rac guanine nucleotide exchange factor 18	102.596	33.3082	1000	391	3.08022	3.49111e-89
BC015662	chr6	-	34212963	34214008	Homo sapiens high mobility group AT-hook 1, mRNA (cDNA clone IMAGE:4844539).	468.558	299.859	4567	3520	1.5626	4.43563e-89
RPS19	chr19	+	42363987	42375482	ribosomal protein S19	657.849	899.576	6412	10560	0.731287	8.10109e-89
BAT2chr6_mcf_hap5+	chr6_mcf_hap5	+	2968139	2985241	HLA-B associated transcript-2	210.425	103.588	2051	1216	2.03138	8.16145e-89
MESDC2	chr15	-	81239669	81282205	mesoderm development candidate 2	42.3723	119.177	413	1399	0.355542	1.08921e-88
C6orf21 variant proteinchr6_mcf_hap5+	chr6_mcf_hap5	+	2968139	2982737	Homo sapiens mRNA for C6orf21 variant protein, partial cds, clone: hj06729.	75.1006	18.5708	732	218	4.04402	2.50794e-88
EEF1A2chr6-	chr6	-	74225474	74229779	RecName: Full=Elongation factor 1-alpha 2; Short=EF-1-alpha-2; Short=Elongation factor 1 A-2; AltName: Full=eEF1A-2; AltName: Full=Statin S1;	2919.59	2472.22	28457	29021	1.18096	2.69698e-88
COX7A2L	chr2	-	42577646	42596150	cytochrome c oxidase subunit VIIa polypeptide 2	236.485	122.584	2305	1439	1.92916	5.40281e-88
DUSP1	chr5	-	172195101	172198203	dual specificity phosphatase 1	160.666	70.0238	1566	822	2.29445	8.37795e-88
C6orf21 variant proteinchr6_dbb_hap3+	chr6_dbb_hap3	+	2874021	2888621	Homo sapiens mRNA for C6orf21 variant protein, partial cds, clone: hj06729.	74.1773	18.2301	723	214	4.06895	9.2015e-88
WBP2	chr17	-	73841780	73851501	WW domain binding protein 2	227.251	116.195	2215	1364	1.95577	1.51192e-87
NFKB2	chr10	+	104154228	104162280	nuclear factor of kappa light polypeptide gene	186.931	87.9132	1822	1032	2.12631	1.81669e-87
BAT3chr6_cox_hap2-	chr6_cox_hap2	-	3116416	3130096	HLA-B associated transcript-3	188.572	89.2761	1838	1048	2.11224	5.59274e-87
BC078172	chr10	-	17257194	17271983	Homo sapiens cDNA clone IMAGE:5760022, partial cds.	93.1576	28.6229	908	336	3.25465	8.19574e-87
HLA-Cchr6_dbb_hap3-	chr6_dbb_hap3	-	2532137	2535452	SubName: Full=MHC class I HLA-C allele; Flags: Precursor; Fragment;	281.935	156.659	2748	1839	1.79967	8.56063e-87
COPG	chr3	+	128968452	128996614	SubName: Full=Gamma1-COP; SubName: Full=Coatomer protein complex, subunit gamma	291.99	164.241	2846	1928	1.77781	1.05402e-86
KIAA1783	chr17	+	73584138	73622925	Homo sapiens mRNA for KIAA1783 protein, partial cds.	187.957	89.0206	1832	1045	2.11139	1.25962e-86
TPR	chr1	-	186280787	186344864	SubName: Full=TPR protein; Flags: Fragment;	30.9841	98.5615	302	1157	0.314363	2.6178e-86
CR596118	chr5	-	134262361	134263997	full-length cDNA clone CS0DF026YI08 of Fetal brain of Homo sapiens (human).	483.332	690.016	4711	8100	0.700465	2.76525e-86
pp7704	chr1	+	153606524	153611374	Homo sapiens HT031 mRNA, complete cds.	96.9537	30.9229	945	363	3.13533	2.82054e-86
DKFZp434C119	chr17	-	42397996	42402217	SubName: Full=cDNA FLJ50246, highly similar to Mitochondrial carrier protein CGI-69;	143.122	59.2051	1395	695	2.4174	3.4784e-86
SOD1	chr21	+	33031934	33041241	superoxide dismutase 1, soluble	955.891	710.887	9317	8345	1.34465	4.24512e-86
RPS27A	chr2	+	55459064	55462748	ubiquitin and ribosomal protein S27a precursor	345.237	522.538	3365	6134	0.660693	6.12154e-86
PLSCR3	chr17	-	7293054	7307418	phospholipid scramblase 3	340.107	201.468	3315	2365	1.68815	8.68244e-86
ATP5G3	chr2	-	176040986	176046490	ATP synthase, H+ transporting, mitochondrial F0	319.691	185.878	3116	2182	1.71989	1.05834e-85
ARPC4	chr3	+	9834226	9848789	actin related protein 2/3 complex subunit 4	252.695	135.703	2463	1593	1.86212	1.10714e-85
BC033739	chr16	-	88715362	88717448	Homo sapiens cDNA FLJ43590 fis, clone SMINT2001818.	112.959	40.5491	1101	476	2.78573	1.44721e-85
ZCRB1	chr12	-	42705888	42719932	zinc finger CCHC-type and RNA binding motif 1	49.8619	129.484	486	1520	0.38508	1.51748e-85
HLA-Bchr6_dbb_hap3-	chr6_dbb_hap3	-	2532297	2535452	SubName: Full=MHC class I antigen; Flags: Fragment;	253.413	136.555	2470	1603	1.85576	3.89037e-85
PEA15	chr1	+	160175124	160185160	phosphoprotein enriched in astrocytes 15	179.954	84.5909	1754	993	2.12735	2.32416e-84
SMARCC1	chr3	-	47627377	47823596	SWI/SNF-related matrix-associated	63.6098	150.1	620	1762	0.423784	2.52724e-84
TTC3	chr21	+	38445570	38575406	tetratricopeptide repeat domain 3	29.753	95.2392	290	1118	0.312403	4.40382e-84
HIST1H4C	chr6	+	26104175	26104564	histone cluster 1, H4c	21.1349	79.5648	206	934	0.265631	5.51215e-84
NAP1L1	chr12	-	76438671	76478738	nucleosome assembly protein 1-like 1	274.138	431.984	2672	5071	0.634602	8.05344e-84
BAT3chr6_ssto_hap7-	chr6_ssto_hap7	-	2937602	2951276	HLA-B associated transcript-3	189.393	91.491	1846	1074	2.07007	1.3466e-83
BAT3chr6_qbl_hap6-	chr6_qbl_hap6	-	2900436	2914115	HLA-B associated transcript-3	189.085	91.3206	1843	1072	2.07056	1.65262e-83
CD63	chr12	-	56119230	56123444	CD63 antigen	411.412	599.632	4010	7039	0.686107	3.87042e-83
C6orf21 variant proteinchr6+	chr6	+	31588449	31603049	Homo sapiens mRNA for C6orf21 variant protein, partial cds, clone: hj06729.	70.0734	17.2078	683	202	4.07219	4.54745e-83
PSMA7	chr20	-	60711790	60718474	proteasome alpha 7 subunit	230.842	376.357	2250	4418	0.61336	6.35253e-83
ARSDR1	chr14	-	68143520	68162510	SubName: Full=cDNA FLJ53708, highly similar to Retinol dehydrogenase 11 (EC 1.1.1.-);	67.0981	154.189	654	1810	0.435169	1.65191e-82
VARSchr6_cox_hap2-	chr6_cox_hap2	-	3254867	3273281	valyl-tRNA synthetase	242.846	130.422	2367	1531	1.86201	2.10428e-82
VARSchr6-	chr6	-	31745298	31763712	Homo sapiens cDNA FLJ54383 complete cds, highly similar to Valyl-tRNA synthetase (EC 6.1.1.9).	242.846	130.507	2367	1532	1.86079	2.92894e-82
VARSchr6_dbb_hap3-	chr6_dbb_hap3	-	3030880	3049294	valyl-tRNA synthetase	242.846	130.507	2367	1532	1.86079	2.92894e-82
LUC7L3	chr17	+	48796976	48830070	LUC7-like 3	51.7086	130.251	504	1529	0.396992	5.43999e-82
C17orf49	chr17	+	6915797	6920838	hypothetical protein LOC124944	436.24	280.181	4252	3289	1.557	6.62329e-82
ANKRD11	chr16	-	89334034	89556969	ankyrin repeat domain 11	51.093	129.144	498	1516	0.395629	9.23635e-82
TRIM33	chr1	-	114935400	115053781	tripartite motif-containing 33 protein	34.8828	102.736	340	1206	0.339539	1.26732e-81
VARSchr6_apd_hap1-	chr6_apd_hap1	-	3060046	3078462	valyl-tRNA synthetase	241.615	129.996	2355	1526	1.85864	1.3412e-81
VARSchr6_mcf_hap5-	chr6_mcf_hap5	-	3124995	3143409	valyl-tRNA synthetase	241.615	129.996	2355	1526	1.85864	1.3412e-81
DNAJC21	chr5	+	34929697	34959068	DnaJ homology subfamily A member 5	31.8049	97.4541	310	1144	0.326358	1.51643e-81
MSN	chrX	+	64887510	64961792	moesin	293.016	168.5	2856	1978	1.73896	1.94153e-81
CROP/Luc7A	chr17	+	48796976	48828365	SubName: Full=cDNA FLJ59548, highly similar to Cisplatin resistance-associated overexpressed protein;	45.6554	119.773	445	1406	0.381183	1.62826e-80
TMEM214	chr2	+	27255773	27264564	transmembrane protein 214	168.463	78.5426	1642	922	2.14487	1.81663e-80
PYCR1	chr17	-	79890268	79895172	pyrroline-5-carboxylate reductase 1	214.119	110.743	2087	1300	1.93347	2.69632e-80
SNRPA	chr19	+	41256778	41271292	small nuclear ribonucleoprotein polypeptide A	205.809	104.865	2006	1231	1.9626	3.85753e-80
MT-ND4L	chrM	+	10469	10766	NADH dehydrogenase subunit 4L	1826.83	2193.91	17806	25754	0.832684	1.72214e-79
RDX	chr11	-	110045604	110167437	radixin	50.8879	127.355	496	1495	0.399575	2.28145e-79
KDM5A	chr12	-	389222	498620	retinoblastoma binding protein 2	25.1361	84.5909	245	993	0.29715	2.63261e-79
SDHAchr5-	chr5	-	1568636	1594646	Homo sapiens cDNA FLJ58919 complete cds, moderately similar to Succinate dehydrogenase (ubiquinone) flavoprotein subunit, mitochondrial precursor (EC1.3.5.1).	31.1893	95.1541	304	1117	0.327777	3.12256e-79
TTF1	chr9	-	135250938	135282221	transcription termination factor, RNA polymerase	29.3426	91.9169	286	1079	0.319229	3.90594e-79
RDH11	chr14	-	68143520	68162510	retinol dehydrogenase 11	69.3552	155.126	676	1821	0.44709	7.14186e-79
PPIG	chr2	+	170440849	170494247	peptidylprolyl isomerase G	26.0595	85.9538	254	1009	0.30318	9.45273e-79
GOLGA2	chr9	-	131018108	131038268	SubName: Full=Golgi autoantigen, golgin subfamily a, 2; Flags: Fragment;	132.144	243.38	1288	2857	0.542955	1.03216e-78
PHIP	chr6	-	79644136	79788011	pleckstrin homology domain interacting protein	24.8283	83.6538	242	982	0.296799	1.50005e-78
DYNC1H1	chr14	+	102430864	102517135	cytoplasmic dynein 1 heavy chain 1	252.9	399.528	2465	4690	0.632998	2.07831e-78
TOP1	chr20	+	39657461	39753124	DNA topoisomerase I	61.0449	142.092	595	1668	0.429615	5.47324e-78
SLTM	chr15	-	59171244	59225852	modulator of estrogen induced transcription	24.5206	82.8019	239	972	0.296135	5.81308e-78
DKFZp762G052	chr15	-	59171244	59225852	SubName: Full=cDNA FLJ30633 fis, clone CTONG2002418, highly similar to Homo sapiens modulator of estrogen induced transcription, transcript variant 1, mRNA; SubName: Full=cDNA FLJ78261;	22.1608	78.4574	216	921	0.282457	7.79901e-78
EIF5A	chr17	+	7210317	7215780	eukaryotic translation initiation factor 5A	1119.23	866.353	10909	10170	1.29188	4.46593e-77
TPP1	chr11	-	6633996	6640692	tripeptidyl-peptidase I preproprotein	91.4135	30.497	891	358	2.99746	6.34505e-77
SNRNP48	chr6	+	7590431	7612199	U11/U12 snRNP 48K	17.3388	68.4905	169	804	0.253156	6.09964e-76
GRP94cchr12+	chr12	+	104324188	104341703	SubName: Full=Heat shock protein 94c;	156.152	272.94	1522	3204	0.572111	6.97611e-76
PSIP1	chr9	-	15464065	15511003	PC4 and SFRS1 interacting protein 1	26.3673	84.9316	257	997	0.310453	9.90496e-76
EIF3J	chr15	+	44829265	44854999	SubName: Full=cDNA FLJ57599, moderately similar to Eukaryotic translation initiation factor 3 subunit 1;	104.135	202.49	1015	2377	0.514275	1.40154e-75
ALPP	chr2	+	233243347	233247597	placental alkaline phosphatase preproprotein	137.479	59.8866	1340	703	2.29566	1.77847e-75
CCDC25	chr8	-	27590834	27630170	Homo sapiens cDNA FLJ10853 fis, clone NT2RP4001502.	52.119	126.588	508	1486	0.411721	4.57006e-75
RHOB	chr2	+	20646834	20649200	ras homolog gene family, member B precursor	226.43	122.84	2207	1442	1.8433	6.75226e-75
RPL7	chr8	-	74202874	74206379	ribosomal protein L7	312.817	469.296	3049	5509	0.666566	1.63141e-74
AK093299	chr1	-	160171988	160178659	Homo sapiens cDNA FLJ35980 fis, clone TESTI2013546.	53.4528	10.904	521	128	4.90214	1.75213e-74
PSMD7	chr16	+	74330680	74340184	SubName: Full=cDNA FLJ51373, highly similar to 26S proteasome non-ATPase regulatory subunit 7;	84.3343	173.782	822	2040	0.485288	1.89403e-74
C16orf88	chr16	-	19717675	19729492	hypothetical protein LOC400506	40.3204	107.591	393	1263	0.374755	2.17194e-74
LYAR	chr4	-	4269430	4291896	Ly1 antibody reactive homolog	24.2128	80.3315	236	943	0.301411	3.31055e-74
TUBB2Achr18+	chr18	+	12308239	12326567	SubName: Full=TUBB2A protein; Flags: Fragment;	172.362	84.4205	1680	991	2.04171	6.19416e-74
SRPK2	chr7	-	104755715	105039798	Synthetic construct DNA, clone: pF1KB3384, Homo sapiens SRPK2 gene for SFRS protein kinase 2, without stop codon, in Flexi system.	39.7048	106.228	387	1247	0.373769	9.2946e-74
OAS3	chr12	+	113376248	113411052	2'-5'oligoadenylate synthetase 3	69.8682	19.3375	681	227	3.6131	1.22774e-73
P2RY11	chr19	+	10222196	10226062	purinergic receptor P2Y11	24.1102	79.65	235	935	0.302701	3.09237e-73
RPN1	chr3	-	128338812	128399918	ribophorin I precursor	331.797	204.534	3234	2401	1.62221	4.06515e-73
PQBP1	chrX	+	48755194	48760419	polyglutamine binding protein 1	283.884	167.308	2767	1964	1.69678	4.11599e-73
PSMB4	chr1	+	151372040	151374412	proteasome beta 4 subunit	302.865	181.96	2952	2136	1.66446	4.15591e-73
PRPF40A	chr2	-	153508108	153573975	formin binding protein 3	36.9347	101.288	360	1189	0.364652	5.42351e-73
NUP188	chr9	+	131709976	131769374	nucleoporin 188kDa	175.543	87.2317	1711	1024	2.01237	8.17265e-73
SQSTM1	chr5	+	179233387	179265075	sequestosome 1	466.711	313.489	4549	3680	1.48877	1.4637e-72
UPF3B	chrX	-	118967988	118986968	UPF3 regulator of nonsense transcripts homolog B	17.031	66.2756	166	778	0.256973	1.61063e-72
HLA-Bchr6-	chr6	-	31236529	31324989	SubName: Full=MHC class I antigen;	212.477	114.321	2071	1342	1.8586	5.57545e-72
RPL37	chr5	-	40831429	40835387	ribosomal protein L37	3256.62	3715.61	31742	43617	0.87647	7.26759e-72
ERGIC1	chr5	+	172261222	172379683	RecName: Full=Endoplasmic reticulum-Golgi intermediate compartment protein 1; AltName: Full=ER-Golgi intermediate compartment 32 kDa protein; Short=ERGIC-32;	191.342	99.0727	1865	1163	1.93133	9.35203e-72
EEF1A1chr6-	chr6	-	74225474	74231291	eukaryotic translation elongation factor 1 alpha	3141.71	2723.26	30622	31968	1.15366	2.44501e-71
TRAF7	chr16	+	2205798	2228129	TNF receptor-associated factor 7	174.311	87.1465	1699	1023	2.00021	2.64445e-71
PTMS	chr12	+	6875540	6880116	parathymosin	779.836	579.102	7601	6798	1.34663	3.18188e-71
ATP5O	chr21	-	35275757	35288158	Homo sapiens full length insert cDNA clone ZD90F06.	171.336	288.103	1670	3382	0.594704	6.7833e-71
PSMB3	chr17	+	36909001	36920477	proteasome beta 3 subunit	539.452	375.505	5258	4408	1.4366	9.04244e-71
